# Supplementary material for: Artificial dual solid-electrolyte interfaces based on in situ organothiol transformation in lithium sulfur battery
Source: PubMed Central journal article supplement (PMC8163853; doi:10.1038/s41467-021-23155-3), 2021-05-28
Supplement: 41467_2021_23155_MOESM1_ESM.pdf [file 41467_2021_23155_MOESM1_ESM.pdf]

**Artificial dual solid-electrolyte interfaces based on in situ organothiol transformation in  
lithium sulfur battery**

Wei Guo<sup>1,4</sup>, Wanying Zhang<sup>1,4</sup>, Yubing Si<sup>1</sup>, Donghai Wang<sup>2</sup>, Yongzhu Fu<sup>1,\*</sup> & Arumugam  
Manthiram<sup>3</sup>

**Affiliations:**

<sup>1</sup>College of Chemistry, Zhengzhou University, Zhengzhou 450001, P. R. China

<sup>2</sup>Department of Mechanical Engineering, The Pennsylvania State University, University Park,  
PA 16802, USA

<sup>3</sup>Materials Science & Engineering Program, Texas Materials Institute, The University of  
Texas at Austin, Austin, TX, 78712 USA

<sup>4</sup>These authors contributed equally: Wei Guo, Wanying Zhang

Correspondence and requests for materials should be addressed to Y. Fu (email:  
yfu@zzu.edu.cn).

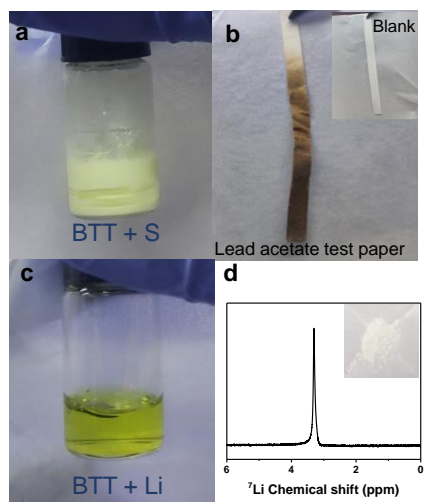

**Supplementary Figure 1. Magnification experiments for the reactions between BTT and sulfur or lithium.** **a** 50 mg BTT and 92 mg S powder were added as mole ratio 1:10 to the DOL/DME (1:1 v/v) solution. **b** Images for the lead acetate test paper in the vial and the blank one. Paper in the vial turns black meaning there is  $\text{H}_2\text{S}$  generated from **a**. **c** 50 mg BTT in DOL/DME solution and a piece of lithium foil was added into it, the solution becomes yellow and with little bubbles. **d**  $^7\text{Li}$  NMR for the lithium benzenetrithiolate ( $\text{Li}_3\text{-BTT}$ ) gained from **c**.

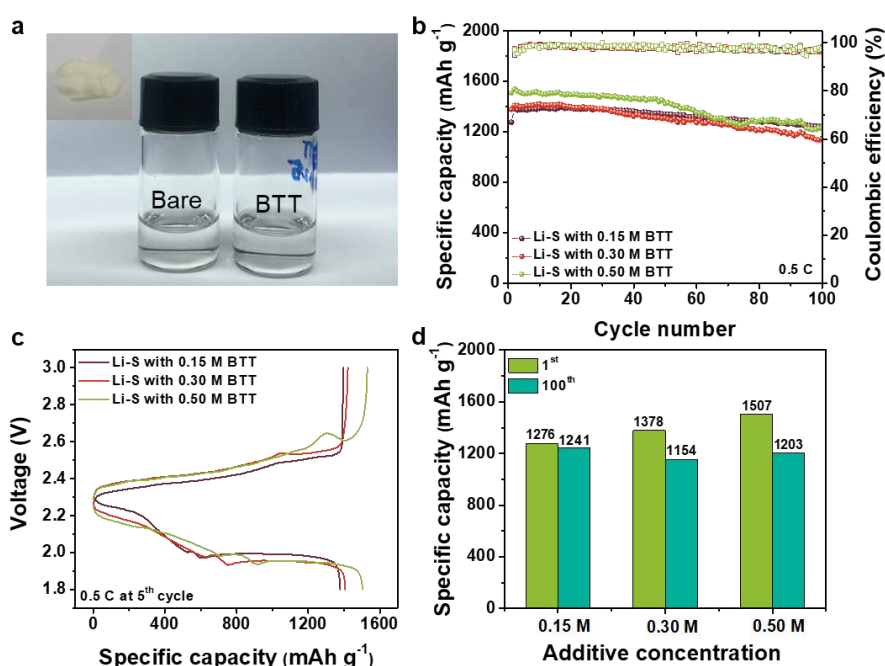

**Supplementary Figure 2. Images for BTT powder and the electrolyte and electrochemical performance of Li-S cells with different concentration additive.** **a** Images for the BTT white powder, BTT and blank electrolyte. **b** Cycling performance of Li-S cells with different concentration BTT at 0.5C rate. **c** Charge and discharge curves of Li-S cells with different concentration BTT at the 5<sup>th</sup> cycle. **d** Specific capacity of Li-S cells with different concentration BTT at the 1<sup>st</sup> cycle and 100<sup>th</sup> cycle.

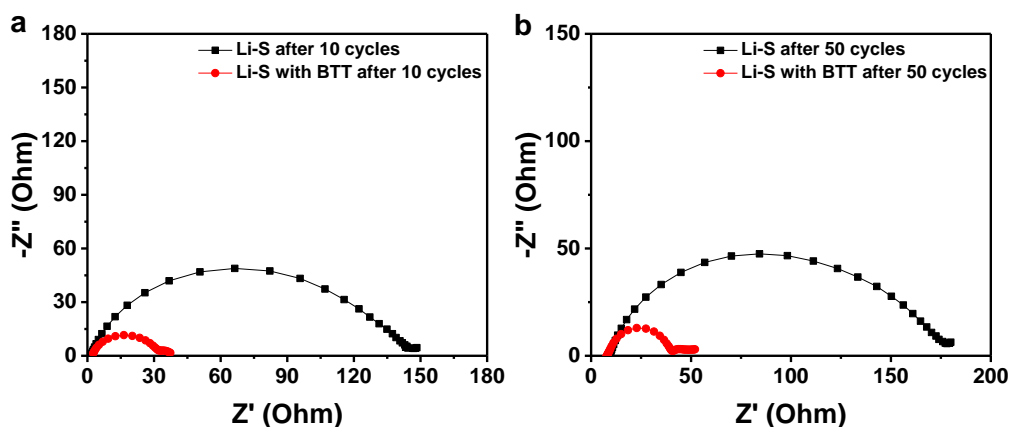

**Supplementary Figure 3.** Nyquist plots of the Li-S cells with BTT and blank electrolyte after cycle at 0.2C rate. **a** Two types of cells after 10 cycles. **b** Two types of cells after 50 cycles.

**Supplementary Table 1.** Impedance of the Li-S with BTT and blank electrolyte with different cycles, and the cells were cycled at 0.2C rate.

| State           | Li-S with BTT impedance at high frequency ( $\Omega$ ) | Li-S with BTT impedance at low frequency ( $\Omega$ ) | Li-S impedance ( $\Omega$ ) |
|-----------------|--------------------------------------------------------|-------------------------------------------------------|-----------------------------|
| Fresh           | 43                                                     | 20                                                    | 131                         |
| After 10 cycles | 30                                                     | 5                                                     | 144                         |
| After 50 cycles | 32                                                     | 7                                                     | 170                         |

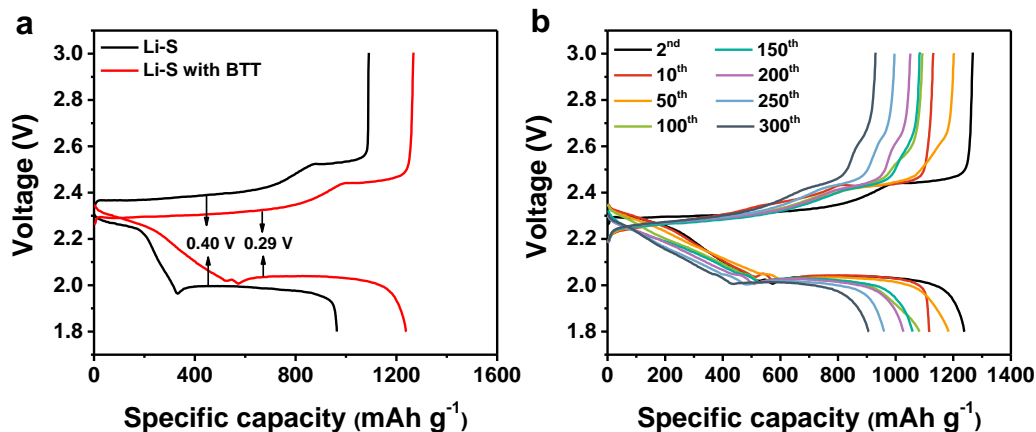

**Supplementary Figure 4. Galvanostatic charge/discharge profile of Li-S cells. a** The 2<sup>nd</sup> charge/discharge curves for Li-S cells with and without BTT at 1C rate. **b** Charge/discharge curves of different cycles for Li-S cell with BTT at 1C rate.

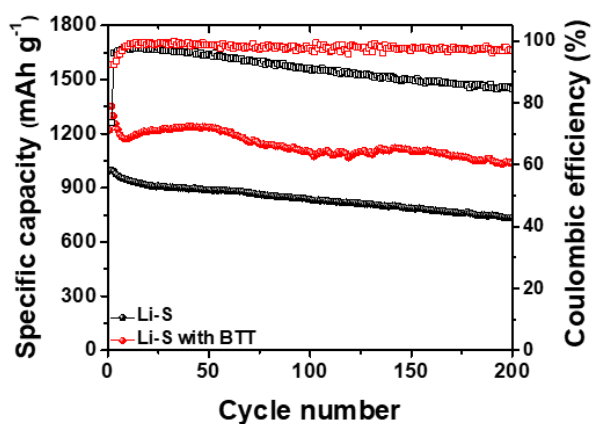

**Supplementary Figure 5. Electrochemical performance of Li-S cells with BTT and blank electrolyte.** Cycling performance of the two types of cells at 0.5C rate with 200 cycles.

**Supplementary Table 2.** Performance comparison of different electrolyte additives in Li-S cells.

| Electrode                          | Electrolyte                                 | Additive                                          | Reversible capacity (mAh g <sup>-1</sup> ) | Current (1 C = 1675 mA g <sup>-1</sup> ) | Capacity retention | Ref.      |
|------------------------------------|---------------------------------------------|---------------------------------------------------|--------------------------------------------|------------------------------------------|--------------------|-----------|
| Sulfur/carbon paper (S/MWCNT)      | 1 M LiTFSI 0.15 M LiNO <sub>3</sub> DOL/DME | 1,3,5-Benzenetrithiol                             | 907.3/300 <sup>th</sup> cycle              | 1 C                                      | 87.6%              | this work |
| Sulfur/carbon slurry               | 1 M LiTFSI TEGDME                           | P <sub>2</sub> S <sub>5</sub>                     | 980/41 <sup>th</sup> cycle                 | 0.1 C                                    | 87.3%              | 28        |
| Sulfur/porous carbon (S/PC)        | 1 M LiTFSI 0.4 M LiNO <sub>3</sub> DOL/DME  | Pyrrrole                                          | 607.3/300 <sup>th</sup> cycle              | 1 C                                      | 53.5%              | 29        |
| Sulfur/carbon black slurry         | 1 M LiTFSI TEGDME/DOL                       | Biphenyl-4,4'-dithiol                             | 575/300 <sup>th</sup> cycle                | 0.1 C                                    | 67.6%              | 41        |
| Sulfur/carbon nanotubes (S/CNT)    | 1 M LiTFSI 0.3 M LiNO <sub>3</sub> DOL/DME  | NH <sub>4</sub> TFSI                              | 340/200 <sup>th</sup> cycle                | 0.1 C                                    | 37.1%              | 30        |
| Hierarchical porous carbon (HPC)/S | 1 M LiTFSI 0.15 M LiNO <sub>3</sub> DOL/DME | Dithiothreitol                                    | 471/500 <sup>th</sup> cycle                | 0.5 C                                    | 58.3%              | 64        |
| Sulfur/carbon nanotubes slurry     | 1 M LiTFSI 0.1 M LiNO <sub>3</sub> DOL/DME  | Cobalt hexadecachloro phthalocyanine (CoPcCl)     | 803.9/200 <sup>th</sup> cycle              | 0.3 C                                    | 73.4%              | 13        |
| Sulfur/carbon black slurry         | 1 M LiTFSI 0.15 M LiNO <sub>3</sub> DOL/DME | Nitrogen-doped carbon dots (N-CDs)                | 447/600 <sup>th</sup> cycle                | 1 C                                      | 59.6%              | 14        |
| Sulfur/Ketjen Black carbon slurry  | 1 M LiTFSI 0.1 M LiNO <sub>3</sub> DOL/DME  | Aluminum phosphate (AlPO <sub>4</sub> )           | 665/100 <sup>th</sup> cycle                | 0.2 C                                    | 76.0%              | 65        |
| Sulfur/carbon black slurry         | 2 M LiTFSI 0.3 M LiNO <sub>3</sub> DOL/DME  | Potassium Hexafluorophosphate (KPF <sub>6</sub> ) | 942/100 <sup>th</sup> cycle                | 0.2 C                                    | 77.8%              | 23        |

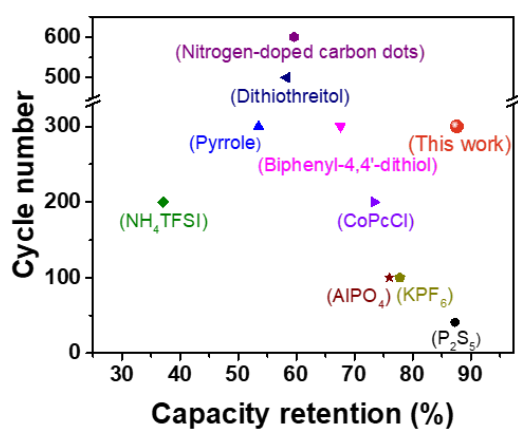

**Supplementary Figure 6.** Capacity retention and cycle number profile of different electrolyte additives in Li-S cells.

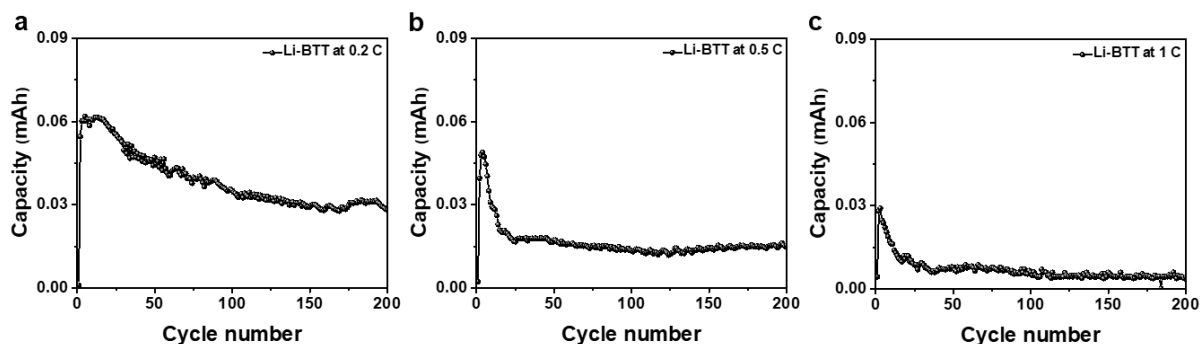

**Supplementary Figure 7. Electrochemical performance of Li-BTT cell without active material. a b c** Cycling performance Li-BTT cells at 0.2C, 0.5C, and 1C rate, respectively. BTT in the electrolyte just provides a little capacity and it decreases quickly after 30 cycles.

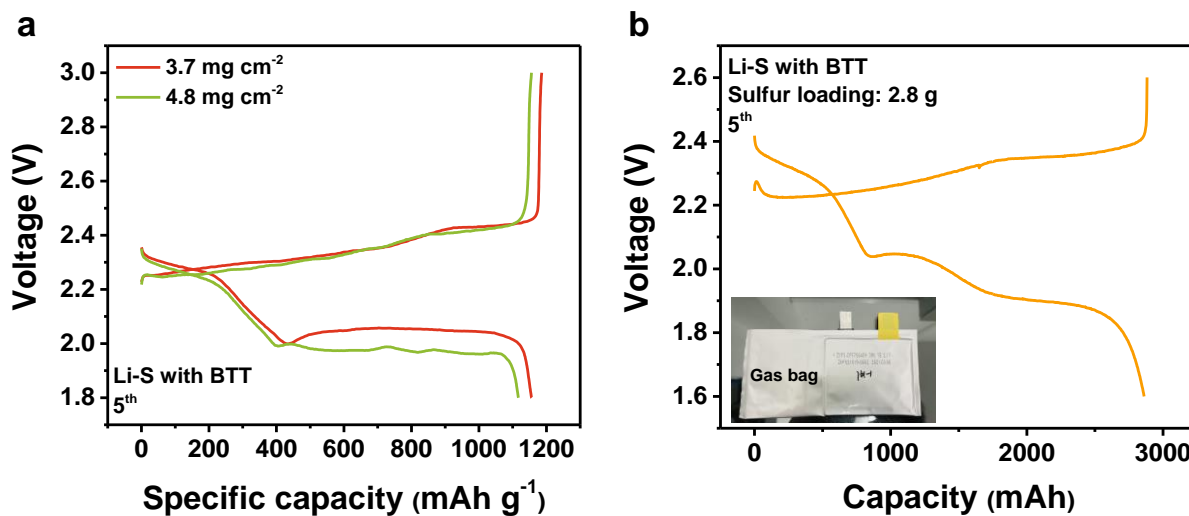

**Supplementary Figure 8. Electrochemical performance of BTT cells with high loading. a** Galvanostatic charge/discharge profile of BTT cells with high sulfur loadings at the 5<sup>th</sup> cycle. **b** Galvanostatic charge/discharge voltage profile of a Li-S pouch cell with BTT electrolyte in the 5<sup>th</sup> cycle, the total sulfur mass is 2.8 g and the E/S ratio is  $2.6 \mu\text{L mg}^{-1}$ . The inset photograph shows the front image of the pouch cell with gas bag.

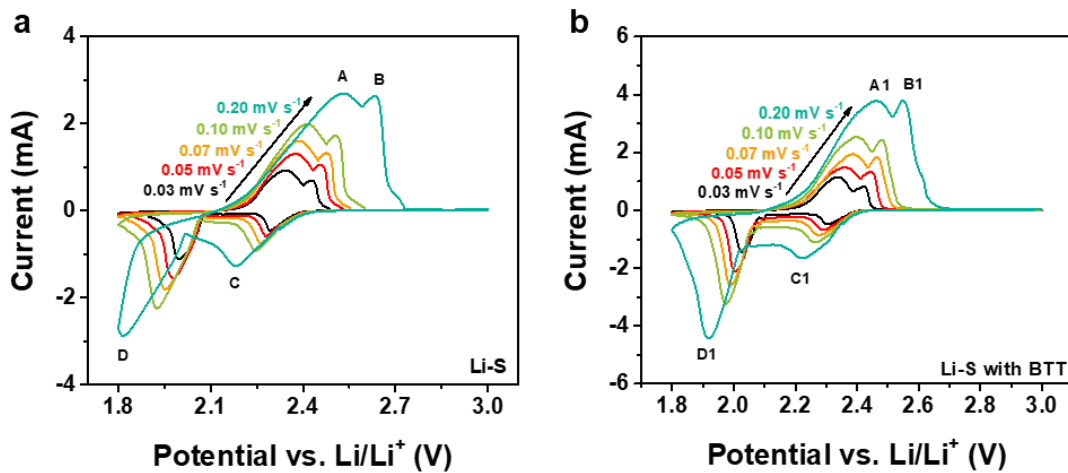

**Supplementary Figure 9.** CVs with different scan rates. **a** For Li-S cell and **b** For the Li-S cell with BTT electrolyte.

**Supplementary Table 3.** Lithium-ion diffusion coefficients calculated by the Randles-Sevcik equation from the linear fits of the peak currents.

| Sample        | $D_{Li^+}$ (A/A1) cm <sup>2</sup> s <sup>-1</sup> | $D_{Li^+}$ (B/B1) cm <sup>2</sup> s <sup>-1</sup> | $D_{Li^+}$ (C/C1) cm <sup>2</sup> s <sup>-1</sup> | $D_{Li^+}$ (D/D1) cm <sup>2</sup> s <sup>-1</sup> |
|---------------|---------------------------------------------------|---------------------------------------------------|---------------------------------------------------|---------------------------------------------------|
| Li-S          | 5.60E-08                                          | 6.78E-08                                          | 1.28E-08                                          | 5.49E-08                                          |
| Li-S with BTT | 1.32E-07                                          | 1.61E-07                                          | 2.51E-08                                          | 1.59E-07                                          |

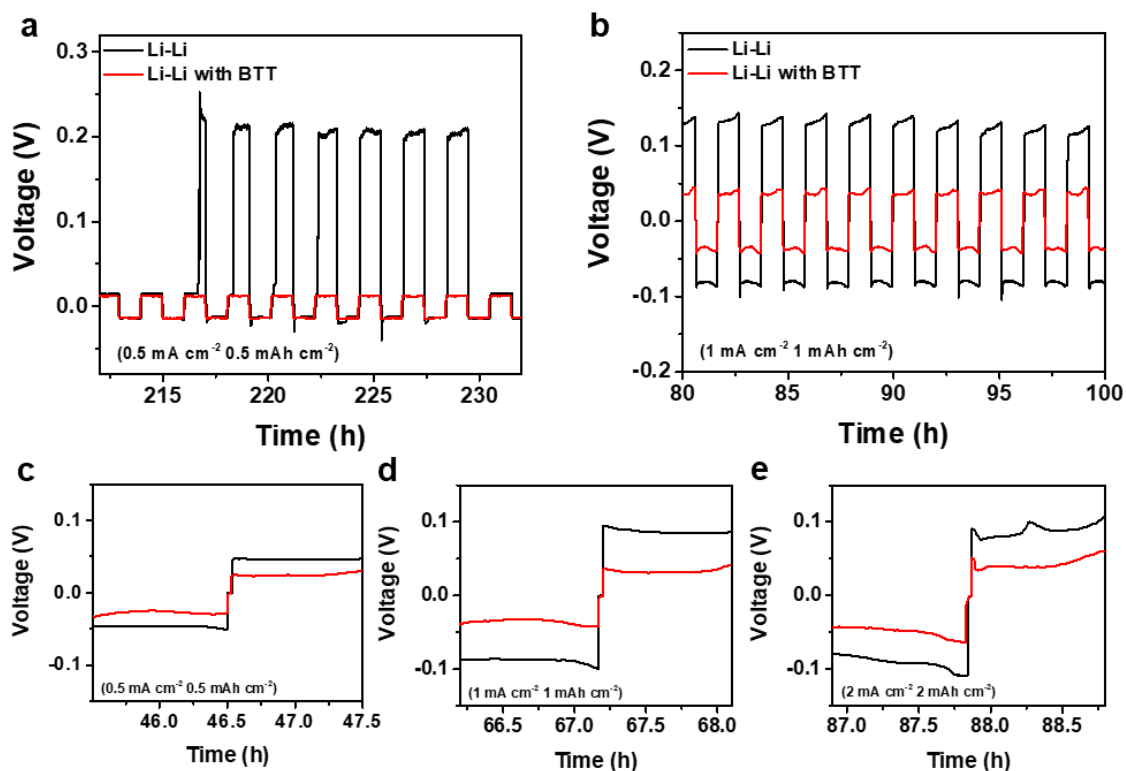

**Supplementary Figure 10. Plating and stripping curves for the lithium symmetric cells with BTT and blank electrolyte.** **a** Enlarged profile of two cells at  $0.5 \text{ mA cm}^{-2}$  ( $0.5 \text{ mAh cm}^{-2}$ ) for 10 cycles. **b** Enlarged profile of two cells at  $1 \text{ mA cm}^{-2}$  ( $1 \text{ mAh cm}^{-2}$ ) for 10 cycles. **c, d, e** Enlarged profiles of two types of cells at different current densities:  $0.5 \text{ mA cm}^{-2}$  ( $0.5 \text{ mAh cm}^{-2}$ ),  $1 \text{ mA cm}^{-2}$  ( $1 \text{ mAh cm}^{-2}$ ), and  $2 \text{ mA cm}^{-2}$  ( $2 \text{ mAh cm}^{-2}$ ).



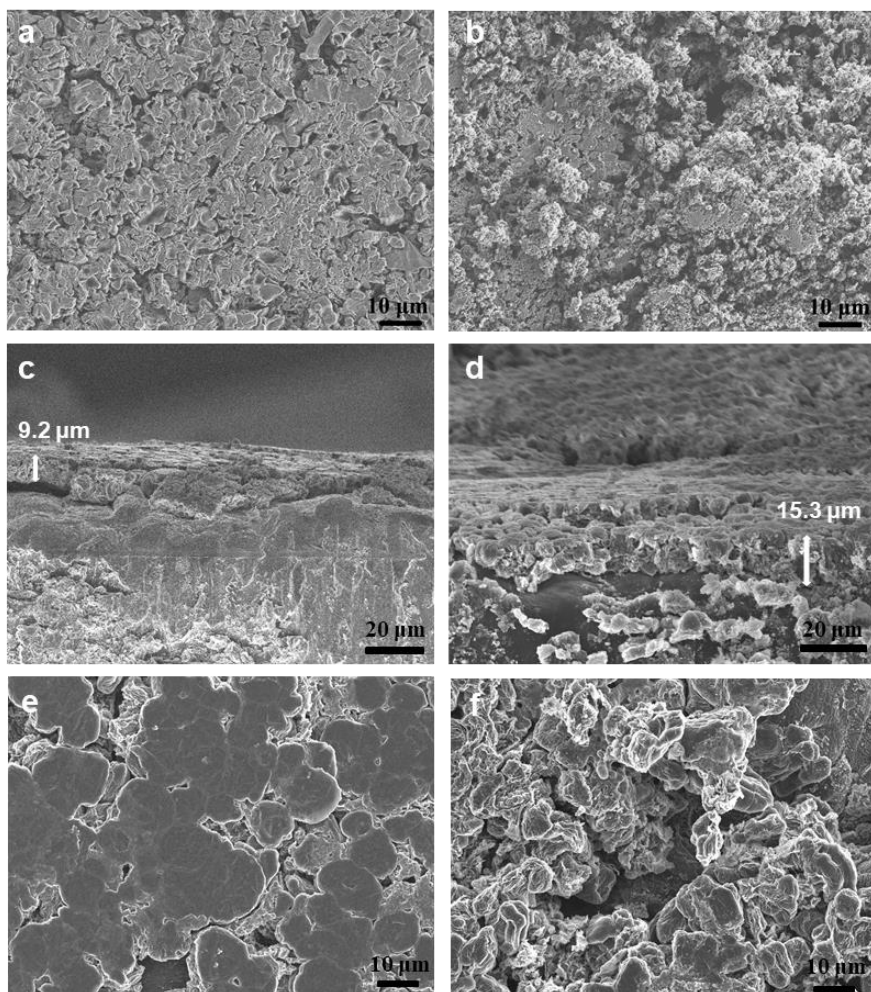

**Supplementary Figure 11. SEM images for lithium foils in symmetric cells and Li-S cells.**

**a** Top view for the symmetric cell with BTT electrolyte after 100 cycles with current density of  $0.5 \text{ mA cm}^{-2}$  capacity density of  $0.5 \text{ mAh cm}^{-2}$ . **b** Top view for the symmetric cell with blank electrolyte. **c d** Cross view for the symmetric cells with BTT and blank electrolyte, respectively. **e f** Top view for lithium foils in Li-S cells with BTT and blank electrolyte after 50 cycles at 0.5C, respectively.

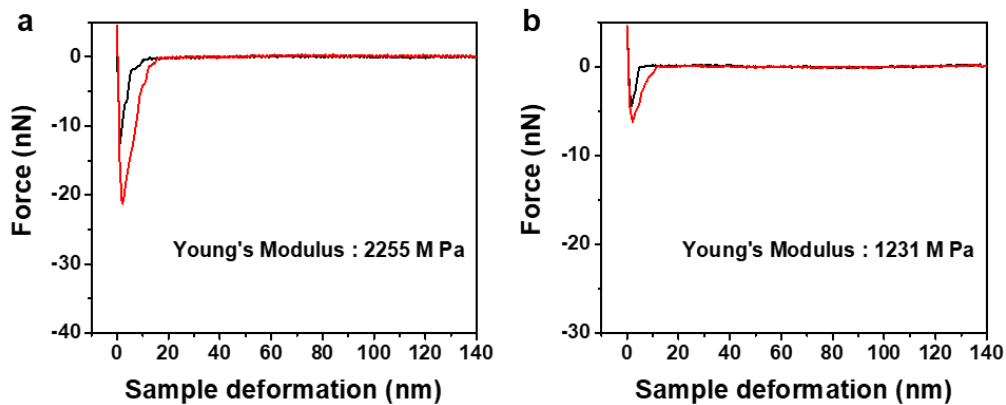

**Supplementary Figure 12. Indentation curves of the SEI layer for the symmetric cells. a** Profile of the SEI layer for symmetric cell with BTT electrolyte. **b** Profile of the SEI layer for symmetric cell with blank electrolyte.

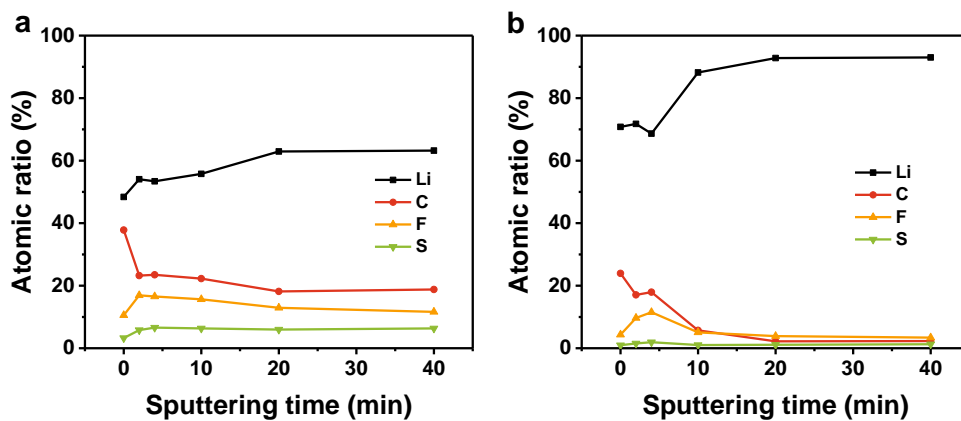

**Supplementary Figure 13. Atomic percentage at various sputtering time. a** Atomic ratio of the four elements in various sputtering depths for the SEI layer formed in lithium symmetric cell with BTT electrolyte. **b** Atomic ratio of the SEI layer formed in blank electrolyte.

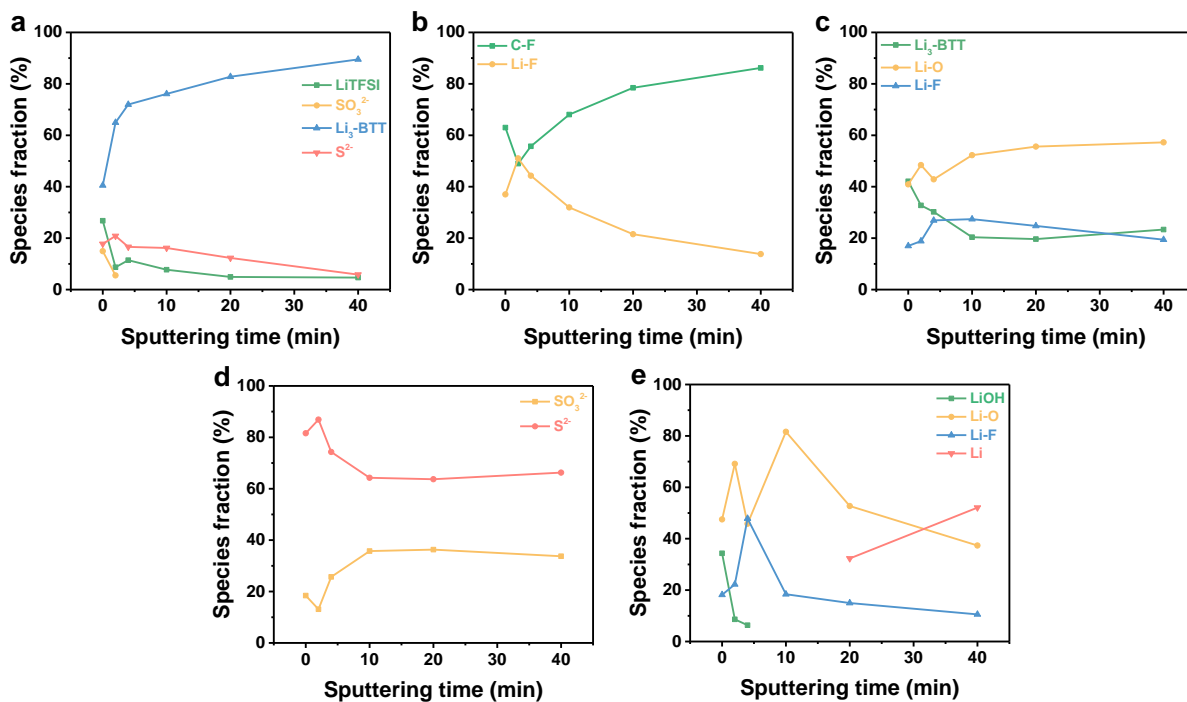

**Supplementary Figure 14. Species fraction at various sputtering time.** a b c Species ratio of the elements S, F, Li in different sputtering depths for the SEI layer formed in lithium symmetric cell with BTT electrolyte. d e Species ratio of the elements S and Li for the SEI layer formed in blank electrolyte.

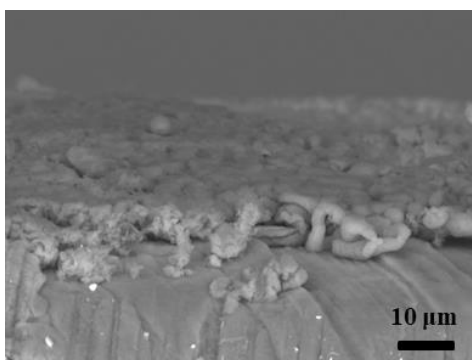

**Supplementary Figure 15. Cross view SEM image for the lithium foil.** Symmetric cell with BTT electrolyte after 50 cycles with current density of  $0.5 \text{ mA cm}^{-2}$  and capacity density of  $0.5 \text{ mAh cm}^{-2}$ .

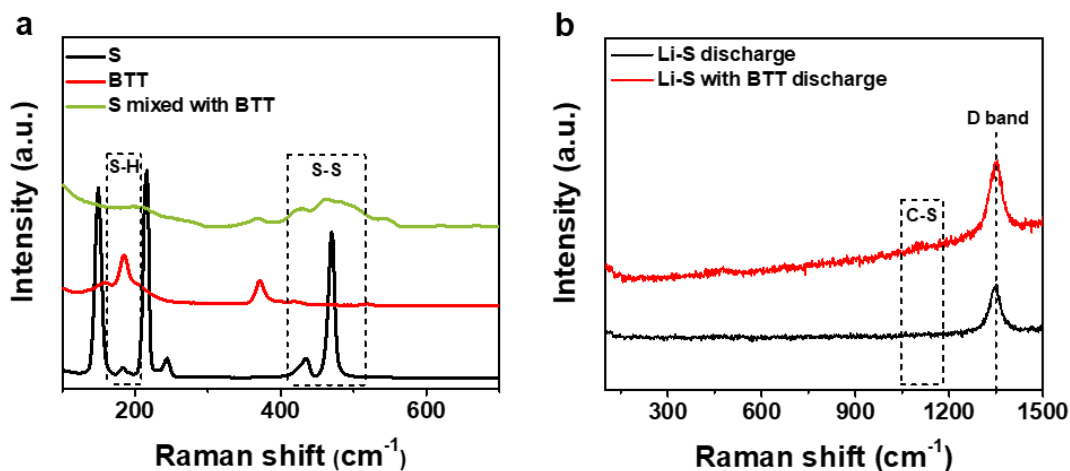

**Supplementary Figure 16. Raman spectra.** **a** Spectra of the raw material and the sulfur cathode with 0.15 M BTT electrolyte. **b** Spectra of the discharged cathodes for the Li-S cells with BTT and blank electrolyte.

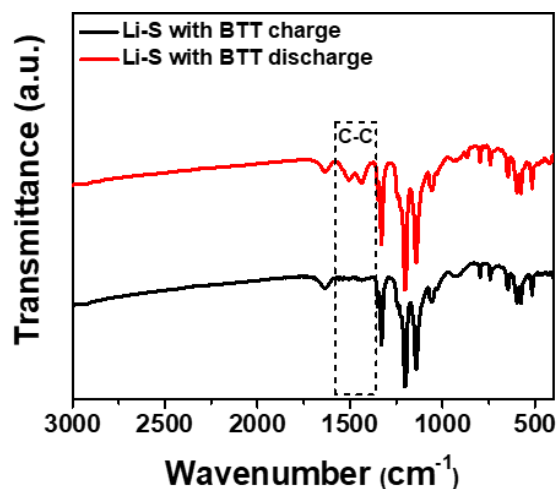

**Supplementary Figure 17. FTIR spectra of the charged and discharged cathodes for Li-S cells with BTT electrolyte.** There is a notable change of the C-C bond vibration for benzene ring.

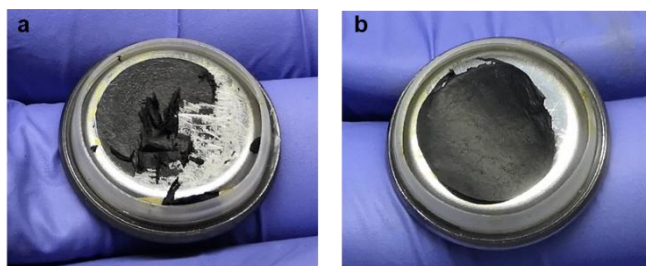

**Supplementary Figure 18. Photographs of the recharged cathodes of Li-S cells with BTT and blank electrolyte at 0.2C rate. a** Image for BTT cell. **b** Image for control cell.

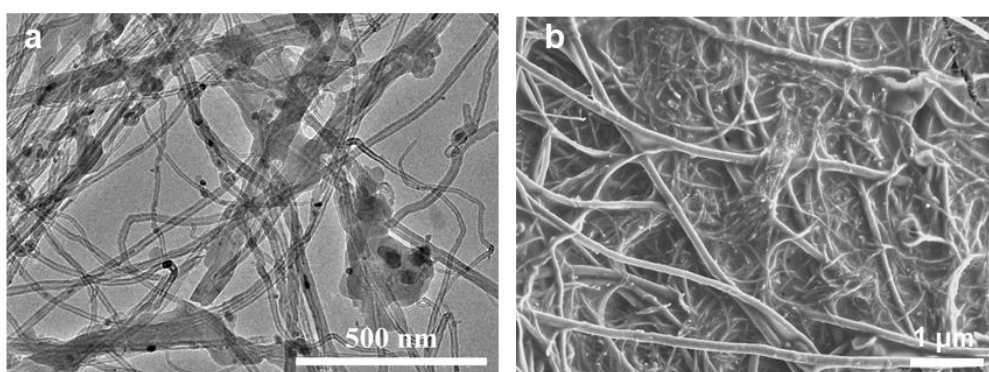

**Supplementary Figure 19. SEM and TEM images for the cathodes of BTT cells. a** TEM image of the recharged cathode for BTT cell with a 500 nm scale bar. **b** SEM image for the recharged cathode for the Li-S with BTT electrolyte after 10 cycles at 0.05C rate.

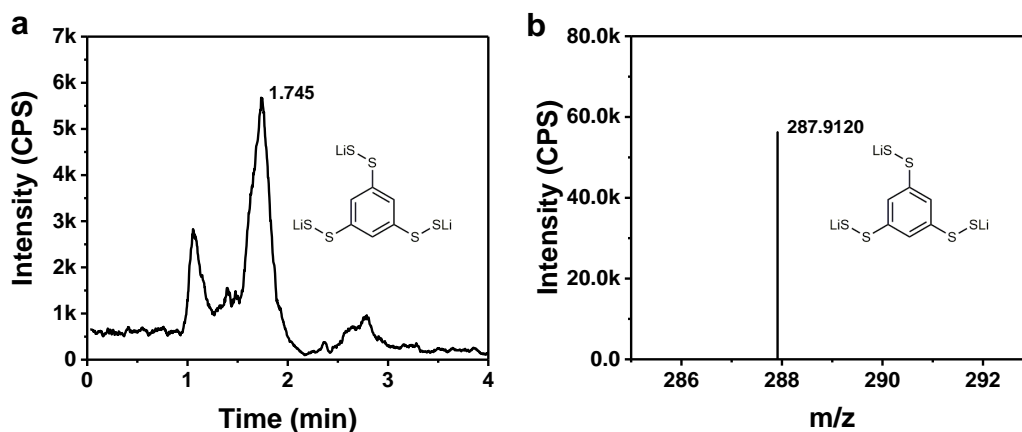

**Supplementary Figure 20. Incompletely discharge product ( $\text{PhS}_6\text{Li}_3$ ). a** XIC of the discharge product for BTT cell. **b** MS profile and corresponding structure were inset.

**Supplementary Table 4.** Binding energies for Li 1s, F 1s, S 2p spectrum in the XPS spectra.

|                     | Species                       | Binding Energy (eV) |
|---------------------|-------------------------------|---------------------|
| Li 1s               | Li-F                          | 57.6                |
|                     | Li-O                          | 56.4                |
|                     | Li <sub>3</sub> -BTT          | 55.1                |
|                     | LiOH                          | 55                  |
|                     | Li                            | 55.2                |
| F 1s                | C-F                           | 687.3               |
|                     | Li-F                          | 685                 |
|                     | LiTFSI                        | 169.2               |
| S 2p <sub>3/2</sub> | SO <sub>3</sub> <sup>2-</sup> | 167.2               |
|                     | S-S                           | 164.1               |
|                     | C-S                           | 163.5               |
|                     | Li <sub>3</sub> -BTT          | 162.7               |
|                     | S <sub>2</sub> <sup>2-</sup>  | 161.7               |
|                     | S <sup>2-</sup>               | 160.2               |

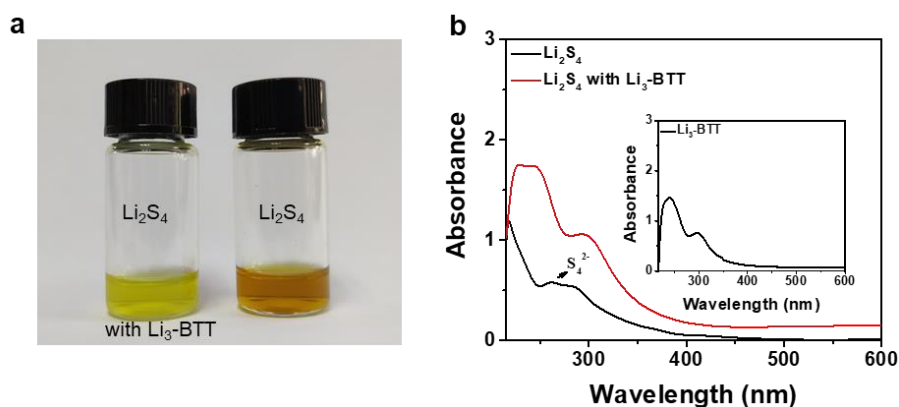

**Supplementary Figure 21.** Polysulfide solution in DOL/DME (1:1 v/v) and the reaction with Li<sub>3</sub>-BTT. **a** Photograph image of the 5 mmol Li<sub>2</sub>S<sub>4</sub> solution and the Li<sub>2</sub>S<sub>4</sub> solution with 4 mg Li<sub>3</sub>-BTT. **b** Corresponding UV-Vis spectra of the two solutions and the spectrum of blank Li<sub>3</sub>-BTT dissolve in DOL/DME was inset.
